# Supplementary material
Source: PubMed Central journal article supplement (PMC6904513)
Supplement: NIHMS1540574-supplement-Supplemental_Online_Appendix.pdf [file NIHMS1540574-supplement-Supplemental_Online_Appendix.pdf]

## Appendix 1: Care Coordination Strategies

|                                |                                                                                                                                                                                                              |
|--------------------------------|--------------------------------------------------------------------------------------------------------------------------------------------------------------------------------------------------------------|
| Predictive Analytics           | Use of predictive analytic tools to identify individual patients at high risk for poor outcomes or extraordinary resource use                                                                                |
| Medication Reconciliation      | Medication reconciliation as part of an established plan of care                                                                                                                                             |
| Hospitalists                   | Hospitalists for medical/surgical inpatients                                                                                                                                                                 |
| Visit Summaries                | Provision of visit summaries to patients as part of all outpatient encounters and scheduling of follow up visit and/or specialty referrals at the time of the initial encounter                              |
| Outreach after Discharge       | Telephonic outreach to discharged patients within 72 hours of discharge                                                                                                                                      |
| Home Visits                    | Arrangement of home visits by physicians, advanced practice nurses, or other professionals for homebound and complex patients for whom office visits constitute a physical hardship                          |
| Prospective Patient Management | Prospective management of patients at high risk for poor outcomes or extraordinary resource use by experienced case managers                                                                                 |
| Discharge Care Plans           | Post-hospital discharge continuity of care program with scaled intensiveness based upon a severity or risk profile for adult medical-surgical patients in defined diagnostic categories or severity profiles |
| Outpatient Follow-up           | Assignment of case managers for outpatient follow-up to patients at risk for hospital admission or readmission                                                                                               |
| Chronic Care Management        | Chronic care management processes or programs to manage patients with high volume, high cost chronic diseases                                                                                                |
| Disease Management Programs    | Disease management programs for one or more chronic care conditions (e.g., asthma, diabetes, COPD)                                                                                                           |
| Nurse Case Manager             | Nurse case managers whose primary job is to improve the quality of outpatient care for patients with chronic diseases (e.g., asthma, CHF, depression, diabetes)                                              |

Data Source: 2015 American Hospital Association (AHA) Survey of Care Systems and Payment  
TM

**Appendix 2. State Variation in AHA Survey of Care Systems and Payment Participation and Overall Hospital Rating Program Performance <sup>a</sup>**

|    | Number of Star Rated Hospitals | Percent of Star Rated Hospitals Participating in Survey | Percent of State that Received 1-3 Stars | Percent of State that Received 4-5 Stars | Percent of 1-3 Star Rated Participating in Survey | Percent of 4-5 Star Rated Participating in Survey | p-value |
|----|--------------------------------|---------------------------------------------------------|------------------------------------------|------------------------------------------|---------------------------------------------------|---------------------------------------------------|---------|
| AK | 8                              | 50%                                                     | 100%                                     | 0%                                       | 100%                                              | 0%                                                | n/a     |
| AL | 78                             | 9%                                                      | 79%                                      | 21%                                      | 57%                                               | 43%                                               | 0.125   |
| AR | 41                             | 24%                                                     | 90%                                      | 10%                                      | 90%                                               | 10%                                               | 0.976   |
| AZ | 50                             | 10%                                                     | 76%                                      | 24%                                      | 60%                                               | 40%                                               | 0.377   |
| CA | 273                            | 19%                                                     | 80%                                      | 20%                                      | 75%                                               | 25%                                               | 0.294   |
| CO | 43                             | 19%                                                     | 51%                                      | 49%                                      | 38%                                               | 63%                                               | 0.391   |
| CT | 27                             | 37%                                                     | 96%                                      | 4%                                       | 90%                                               | 10%                                               | 0.184   |
| DC | 7                              | 29%                                                     | 100%                                     | 0%                                       | 100%                                              | 0%                                                | n/a     |
| DE | 5                              | 60%                                                     | 40%                                      | 60%                                      | 0%                                                | 100%                                              | 0.025*  |
| FL | 164                            | 21%                                                     | 88%                                      | 12%                                      | 91%                                               | 9%                                                | 0.460   |
| GA | 95                             | 17%                                                     | 84%                                      | 16%                                      | 88%                                               | 13%                                               | 0.692   |
| GU | 1                              | 0%                                                      | 100%                                     | 0%                                       | No Participants                                   | No Participants                                   | n/a     |
| HI | 12                             | 25%                                                     | 58%                                      | 42%                                      | 33%                                               | 67%                                               | 0.310   |
| IA | 34                             | 38%                                                     | 62%                                      | 38%                                      | 62%                                               | 38%                                               | 0.983   |
| ID | 10                             | 40%                                                     | 60%                                      | 40%                                      | 50%                                               | 50%                                               | 0.598   |
| IL | 123                            | 40%                                                     | 72%                                      | 28%                                      | 63%                                               | 37%                                               | 0.067   |
| IN | 73                             | 27%                                                     | 45%                                      | 55%                                      | 50%                                               | 50%                                               | 0.613   |
| KS | 39                             | 26%                                                     | 64%                                      | 36%                                      | 60%                                               | 40%                                               | 0.754   |
| KY | 63                             | 22%                                                     | 79%                                      | 21%                                      | 71%                                               | 29%                                               | 0.405   |
| LA | 67                             | 16%                                                     | 73%                                      | 27%                                      | 82%                                               | 18%                                               | 0.477   |
| MA | 52                             | 29%                                                     | 75%                                      | 25%                                      | 80%                                               | 20%                                               | 0.596   |
| ME | 17                             | 47%                                                     | 53%                                      | 47%                                      | 63%                                               | 38%                                               | 0.457   |
| MI | 85                             | 35%                                                     | 64%                                      | 36%                                      | 73%                                               | 27%                                               | 0.165   |
| MN | 48                             | 13%                                                     | 48%                                      | 52%                                      | 50%                                               | 50%                                               | 0.913   |
| MO | 72                             | 25%                                                     | 78%                                      | 22%                                      | 89%                                               | 11%                                               | 0.190   |
| MS | 52                             | 10%                                                     | 85%                                      | 15%                                      | 60%                                               | 40%                                               | 0.109   |
| MT | 10                             | 10%                                                     | 50%                                      | 50%                                      | 0%                                                | 100%                                              | 0.292   |
| NC | 79                             | 29%                                                     | 77%                                      | 23%                                      | 70%                                               | 30%                                               | 0.299   |
| ND | 6                              | 50%                                                     | 67%                                      | 33%                                      | 67%                                               | 33%                                               | 1       |
| NE | 18                             | 17%                                                     | 78%                                      | 22%                                      | 100%                                              | 0%                                                | 0.310   |
| NH | 13                             | 38%                                                     | 38%                                      | 62%                                      | 20%                                               | 80%                                               | 0.279   |
| NJ | 62                             | 39%                                                     | 85%                                      | 15%                                      | 79%                                               | 21%                                               | 0.262   |
| NM | 26                             | 8%                                                      | 88%                                      | 12%                                      | 100%                                              | 0%                                                | 0.595   |
| NV | 19                             | 11%                                                     | 95%                                      | 5%                                       | 100%                                              | 0%                                                | 0.725   |
| NY | 142                            | 39%                                                     | 92%                                      | 8%                                       | 91%                                               | 9%                                                | 0.869   |
| OH | 114                            | 24%                                                     | 52%                                      | 48%                                      | 48%                                               | 52%                                               | 0.668   |
| OK | 68                             | 13%                                                     | 81%                                      | 19%                                      | 78%                                               | 22%                                               | 0.799   |

|       |      |     |      |     |                 |                 |        |
|-------|------|-----|------|-----|-----------------|-----------------|--------|
| OR    | 34   | 21% | 76%  | 24% | 86%             | 14%             | 0.518  |
| PA    | 135  | 30% | 71%  | 29% | 76%             | 24%             | 0.466  |
| PR    | 9    | 0%  | 100% | 0%  | No Participants | No Participants | n/a    |
| RI    | 10   | 20% | 70%  | 30% | 50%             | 50%             | 0.490  |
| SC    | 50   | 16% | 62%  | 38% | 75%             | 25%             | 0.409  |
| SD    | 11   | 27% | 18%  | 82% | 0%              | 100%            | 0.338  |
| TN    | 86   | 9%  | 84%  | 16% | 88%             | 13%             | 0.761  |
| TX    | 239  | 22% | 67%  | 33% | 70%             | 30%             | 0.667  |
| UT    | 27   | 15% | 52%  | 48% | 25%             | 75%             | 0.244  |
| VA    | 73   | 27% | 78%  | 22% | 75%             | 25%             | 0.696  |
| VI    | 2    | 0%  | 100% | 0%  | No Participants | No Participants | n/a    |
| VT    | 6    | 50% | 33%  | 67% | 0%              | 100%            | 0.083  |
| WA    | 48   | 23% | 83%  | 17% | 64%             | 36%             | 0.046* |
| WI    | 62   | 40% | 39%  | 61% | 40%             | 60%             | 0.864  |
| WV    | 28   | 32% | 96%  | 4%  | 100%            | 0%              | 0.483  |
| WY    | 9    | 33% | 78%  | 22% | 67%             | 33%             | 0.571  |
| Total | 2925 | 24% | 74%  | 26% | 71%             | 29%             | 0.076  |

a. \*p<0.05, \*\*p<0.01, \*\*\*p<0.001

**Appendix 3.** Distribution of Number of Hospitals by Number of Care Coordination Strategies Implemented <sup>a</sup>

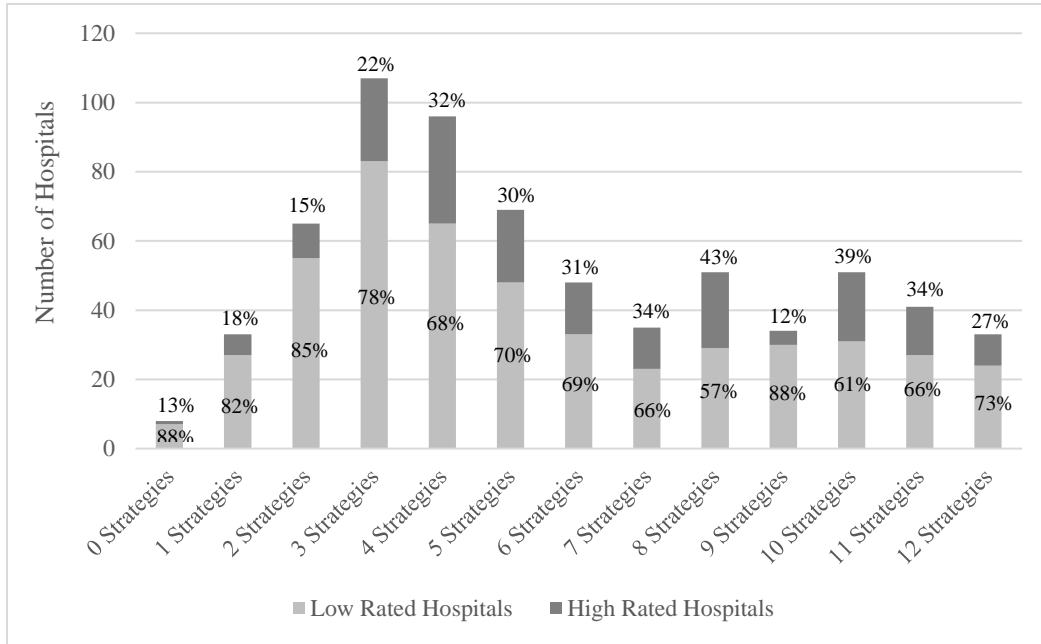

a. The percentages are the percentage of high rated and low rated hospitals for each care coordination strategy category.
